# Supplementary material for: Matching-adjusted indirect comparison: secukinumab versus infliximab in biologic-naive patients with psoriatic arthritis
Source: Atypon-hosted journal article supplement (doi:10.2217/cer-2018-0141), 2019-02-26
Supplement: suppl_file.docx [file suppl_file.docx]

# List of Supplementary figures and tables

Supplementary Figure 1. PRISMA flowchart .

Supplementary Figure 2. ACR 20, ACR 50 and ACR 70 response rates for secukinumab 150 mg, secukinumab 300 mg and infliximab 5 mg/kg (sensitivity analysis).

Supplementary Table 1. Eligibility criteria (PICOS) for the systematic literature review.

Supplementary Table 2. Trials identified by the systematic literature review and the reasons for their inclusion/exclusion in this MAIC.

Supplementary Table 3. Baseline characteristics before and after matching (sensitivity analysis).

Supplementary Table 4. ACR 20 response rates for secukinumab 150 mg, secukinumab 300 mg and infliximab at week 54/52 estimated by alternative imputation methods (principal analysis).

Supplementary Table 5. ACR 20, ACR 50 and ACR 70 response rates (odds ratios) for secukinumab 150 mg and secukinumab 300 mg versus infliximab (sensitivity analysis).

Supplementary Table 6. SF-36 scores for infliximab, secukinumab 150 mg and secukinumab 300 mg (sensitivity analysis).

Supplementary Figure 1. PRISMA flowchart.

The rules for this SLR with a cut-off in November 2015 were set *a priori* (as defined in **Supplementary Table 1**), yielding 128 publications covering 29 trials. A second filter was then applied (i.e. studies that contained either infliximab or secukinumab), yielding 11 trials.

MAIC: Matching-Adjusted Indirect Comparison; PRISMA: Preferred Reporting Items for Systematic Reviews and Meta-Analyses; SLR: systematic literature review.


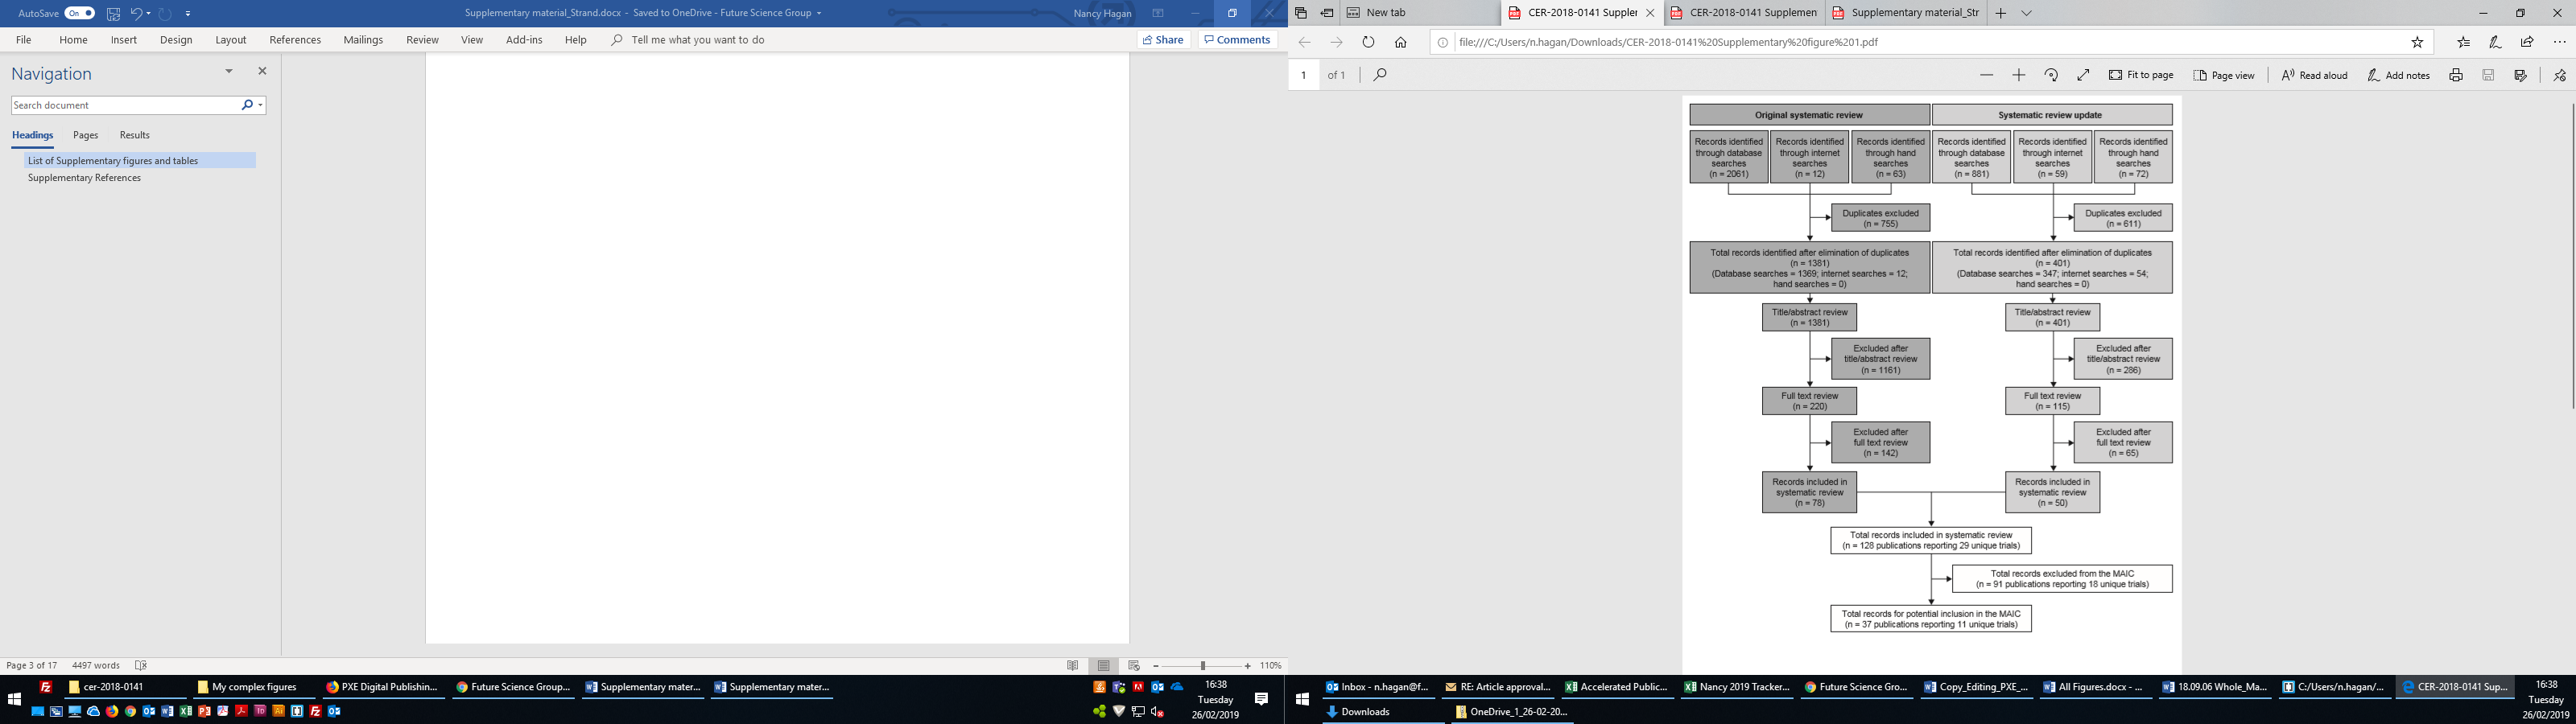


Supplementary Figure 2. ACR 20, ACR 50 and ACR 70 response rates for secukinumab 150 mg, secukinumab 300 mg and infliximab 5 mg/kg (sensitivity analysis).

For non-placebo-adjusted comparisons, ACR 20, ACR 50 and ACR 70 responses are the absolute mean response rate (IMPACT 2) and the predicted mean response rate (FUTURE 2/3). For placebo-adjusted comparisons, the numbers represent differences in response rates between active treatment and placebo. Error bars show 95% confidence intervals. Week 52 FUTURE 2/3 secukinumab ITT population (observed values) was compared with week 54 IMPACT 2 infliximab ITT population (MEF/MEX). pvalues are presented at the 5% significance threshold, and are derived from OR values. Note that there are cases in which ORs (and corresponding p values) cannot be calculated due to the proportion of ACR 70 responders in the IMPACT 2 placebo arm being 0.

ACR: American College of Rheumatology; ACR 20/50/70: at least a 20%, 50% or 70% improvement according to the ACR response criteria; ESS: effective sample size; INF: infliximab; ITT: intent-to-treat; MEF: missing equals failure; MEX: missing values excluded; OR: odds ratio; SEC: secukinumab.


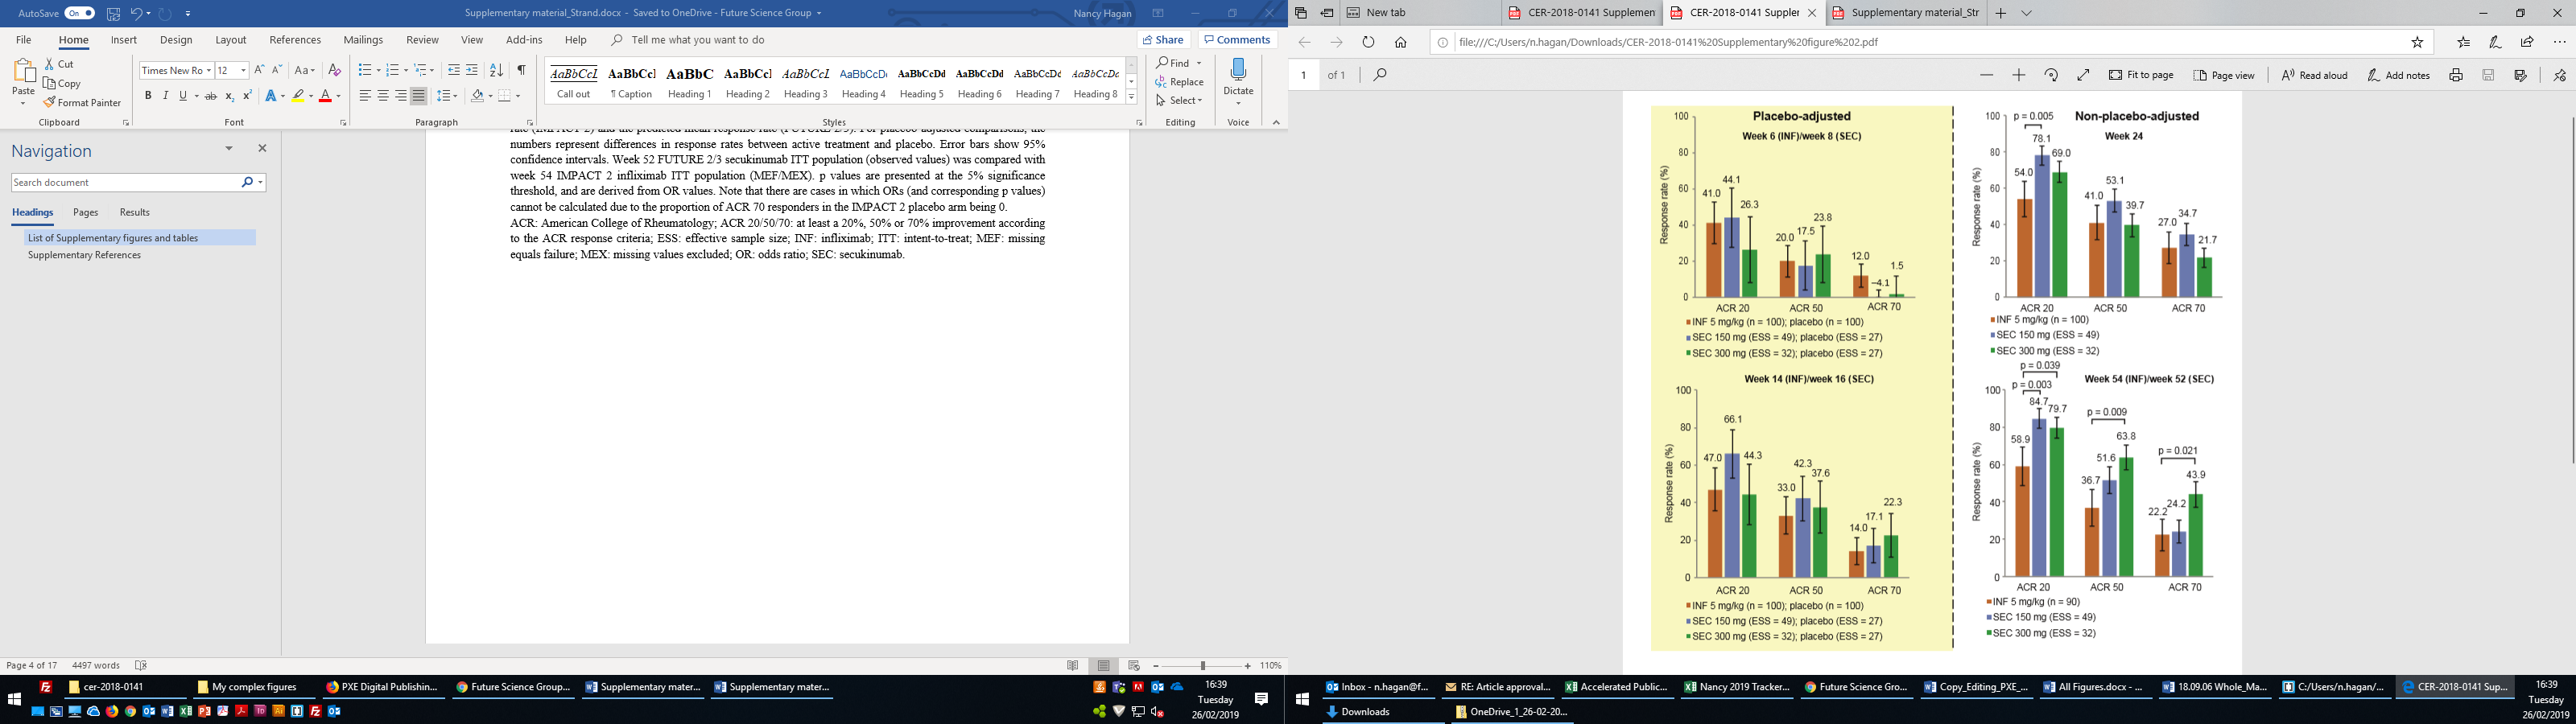


Supplementary Table 1. Eligibility criteria (PICOS) for the systematic literature review.

| Criteria | Inclusion criteria | Exclusion criteria |
| --- | --- | --- |
| Population | - Adults (aged ≥ 18 years) with active PsA despite treatment with csDMARDs, NSAIDs and/or previous TNFi therapy and/or previous biologic therapy - Subgroups of patients with PsA in psoriasis studies were included, provided that all patients in the study were adults (aged ≥ 18 years) with active psoriasis despite topical treatment, phototherapy and/or previous systemic therapy | - Children (< 18 years) - Participants experiencing active, ongoing inflammatory diseases other than PsA |
| Intervention | - Secukinumab (Cosentyx®, Novartis, Basel, Switzerland) - Etanercept (Enbrel®, Amgen, Thousand Oaks, CA, USA) - Adalimumab (Humira®, Abbvie Inc., North Chicage, IL, USA) - Infliximab (Remicade®, Janssen Pharmaceutica, Beerse, Belgium) - Ustekinumab (Stelara®,Janssen Pharmaceutica, Beerse, Belgium) - Golimumab (Simponi®, Janssen Pharmaceutica, Beerse, Belgium) - Certolizumab (Cimzia®, UCB, Brussels, Belgium) - Apremilast (Otezla®, Celgene, Summit, NJ, USA) - Ixekizumab (Taltz®, Eli Lilly and Company, Indianapolis, IN, USA) | - Non-biologic treatments for PsA other than apremilast (e.g. csDMARDs) |
| Comparators | - Interventions listed above - Methotrexate - Placebo |  |
| Outcomes  (sift 2 only)† | Efficacy measurements   - Proportion of patients achieving ACR 20, ACR 50 and ACR 70 responses - Proportion of patients achieving PASI 50, PASI 75 and PASI 90 responses in the subgroup of patients who had skin involvement with PsA - PsARC - Response per the DAS28-CRP - HRQoL outcomes (HAQ-DI, SF-36, DLQI; change in HAQ conditional upon PsARC response captured) - HRQoL assessments, including the EQ-5D - Signs and symptoms of PsA (including swollen joint counts, tender joint counts, CRP levels, enthesitis and dactylitis scores, mTSS and VdH score)   Safety outcomes reported at study endpoint   - Overall AEs - Discontinuations due to AEs - Serious AEs (e.g. cardiovascular events, death, malignancies [melanoma and lymphoma] and serious infections [e.g. tuberculosis and herpes]) - Individual safety outcomes of interest may include opportunistic infections, neutropenia, malignancies, hypersensitivity and major adverse cardiac events |  |
| Study design | - Randomized, controlled, prospective, clinical trials, including phase 2 and phase 3 - Systematic reviews, meta-analyses and pooled analyses (sift 1 only)**‡** | - Non-randomized trials - Preclinical studies - Phase 1 studies - Long-term follow-up studies - Prospective observational studies - Prognostic studies - Retrospective studies - Case reports - Commentaries and letters - Consensus reports - Non-systematic reviews |

**†**Studies were screened for outcomes during the full-text review only; at the title/abstract screening stage, any outcomes were permitted. **‡**Systematic reviews and meta-analyses were included at the title/abstract screening stage and used for identification of any additional primary studies not identified through the database searches, but were excluded during the full-text review.

ACR: American College of Rheumatology; ACR 20/50/70: at least a 20%, 50% or 70% improvement according to the ACR response criteria; AE: adverse event; CRP: C-reactive protein; DAS28-CRP: 28-joint Disease Activity Score using CRP as acute phase reactant; DLQI: Dermatology Life Quality Index; csDMARD: conventional synthetic disease-modifying anti-rheumatic drug; EQ-5D: 5-Dimension EuroQol questionnaire; HAQ: Health Assessment Questionnaire; HAQ-DI: HAQ Disability Index; HRQoL: health-related quality of life; mTSS: modified total Sharp score; NSAID: non-steroidal anti-inflammatory drug; PASI: Psoriasis Area and Severity Index; PASI 50/75/90: at least a 50%, 75% or 90% improvement in PASI score; PICOS: population, intervention, comparators, outcomes and study design; PsA: psoriatic arthritis; PsARC: PsA response criteria; SF-36: 36-item Short-Form Health Survey; TNFi: tumour necrosis factor inhibitor; VdH: van der Heijde.

Supplementary Table 2. Trials identified by the systematic literature review and the reasons for their inclusion/exclusion in this MAIC.

| Trial | Intervention | Comparator | Population | Primary study reference | Secondary reference(s) | Study included in MAIC analysis? |
| --- | --- | --- | --- | --- | --- | --- |
| **CLEAR (subanalysis)** | SEC 300 mg s.c. at weeks 0, 1, 2, 3, then Q4W from week 4 | Ustekinumab 45 mg s.c. for individuals ≤ 100 kg and 90 mg s.c. for individuals > 100 kg at weeks 0 and 4, then Q12W from week 16 | CLEAR included 676 patients with moderate-to-severe psoriasis whose disease was inadequately controlled by topical treatment, phototherapy and/or previous systemic therapy  123 patients had concomitant PsA | Tintle and Gottlieb 2015 [[1](#_ENREF_1)] | None | **No** – included patients with moderate-to-severe psoriasis, of whom a subgroup had concomitant PsA |
| **ERASURE (subanalysis)** | SEC 300 mg or 150 mg s.c. at weeks 0, 1, 2, 3 and 4, then Q4W until week 48 | Placebo | ERASURE included patients with moderate-to-severe psoriasis whose disease was poorly controlled by topical treatment, phototherapy and/or previous systemic therapy  171 patients had concomitant PsA | Gottlieb 2013 [[2](#_ENREF_2)]  Gottlieb 2015 [[3](#_ENREF_3)] | Blauvelt 2014 [[4](#_ENREF_4)]  Gottlieb 2014 [[5](#_ENREF_5)]  Philipp 2015 [[6](#_ENREF_6)] | **No** – included patients with moderate-to-severe psoriasis, of whom a subgroup had concomitant PsA |
| **FIXTURE (subanalysis)** | SEC 300 mg or 150 mg s.c. QW for 4 weeks | Placebo | FIXTURE included patients with moderate-to-severe psoriasis whose disease was poorly controlled by topical treatment, phototherapy and/or previous systemic therapy  196 patients had concomitant PsA | Gottlieb 2015 [[3](#_ENREF_3)] | Philipp 2015 [[6](#_ENREF_6)]  Gottlieb 2013 [[7](#_ENREF_7)]  Sigurgeirsson 2014 [[8](#_ENREF_8)] | **No** – included patients with moderate-to-severe psoriasis, of whom a subgroup had concomitant PsA |
| **FUTURE 1** | SEC 10 mg/kg i.v. at weeks 0, 2 and 4, then 150 mg or 75 mg s.c. Q4W thereafter | Placebo | 606 patients with PsA and an inadequate response or intolerance to NSAIDs | Mease 2015 [[9](#_ENREF_9)] | Gottlieb 2014 [[10](#_ENREF_10)]  Mease 2014 [[11](#_ENREF_11)]  Mease 2015 [[12](#_ENREF_12)]  Mease 2015 [[13](#_ENREF_13)]  Strand 2014 [[14](#_ENREF_14)]  van der Heijde 2014 [[15](#_ENREF_15)] | **No** – i.v. loading |
| **FUTURE 2** | SEC 300 mg or 150 mg s.c. QW from baseline to week 4, then Q4W | Placebo | 298 patients with active PsA despite treatment with NSAIDs, csDMARDs or TNFis | McInnes 2015 [[16](#_ENREF_16)] | Gottlieb 2015 [[17](#_ENREF_17)]  Gottlieb 2015 [[18](#_ENREF_18)]  Kavanaugh 2015 [[19](#_ENREF_19)]  McInnes 2014 [[20](#_ENREF_20)]  Mease 2015 [[21](#_ENREF_21)]  Rahman 2015 [[22](#_ENREF_22)] | **Yes** |
| **IMPACT** | Infliximab 5 mg/kg at weeks 0, 2, 6 and 14 | Placebo | 104 patients with active PsA despite previous treatment with at least one DMARD | Antoni 2005 [[23](#_ENREF_23)] | Antoni 2008 [[24](#_ENREF_24)]  Kavanaugh 2006 [[25](#_ENREF_25)] | **No –** included patients in whom conventional NSAID therapy did not have to fail before they received infliximab  Moreover, study population was smaller compared with IMPACT 2 |
| **IMPACT 2** | Infliximab 5 mg/kg at weeks 0, 2, 6 and 14 | Placebo | 200 patients with active PsA and inadequate response to current or previous DMARDs or NSAIDs | Antoni 2005 [[26](#_ENREF_26)] | Kavanaugh 2006 [[27](#_ENREF_27)]  Kavanaugh 2007 [[28](#_ENREF_28)] | **Yes** |
| **McInnes (2014)** | SEC 10 mg/kg i.v. at weeks 0 and 3 | Placebo | 42 patients with active PsA | McInnes 2014 [[29](#_ENREF_29)] | McInnes 2012 [[30](#_ENREF_30)]  McInnes 2012 [[31](#_ENREF_31)] | **No –** this was a phase 2 trial |
| **RESPOND** | Infliximab 5 mg/kg infusions at weeks 0, 2, 6 and 14 plus methotrexate 15 mg/week | Methotrexate 15 mg/week | 115 patients with PsA | Baranauskaite 2012 [[32](#_ENREF_32)] | None | **No –** this was an open-label trial  Data available only until week 16 |
| **Saougou (2011)** | Infliximab 5 mg/kg i.v. at weeks 0, 2, 6 and Q8W thereafter | Etanercept 25 mg s.c. BIW  Adalimumab 40 mg s.c. EOW | 65 patients with active PsA refractory to at least two DMARDs | Saougou 2011 [[33](#_ENREF_33)] | Saougou 2009 [[34](#_ENREF_34)] | **No –** this was an observational cohort study |
| **Torii (2010)** | Infliximab 5 mg/kg at weeks 0, 2 and 6, followed by Q8W from week 14 to week 62 | Placebo at weeks 0, 2 and 6, switching to infliximab at week 16 | 54 patients with moderate-to-severe psoriasis, including PsA | Torii 2010 [[35](#_ENREF_35)] | None | **No –** this study only included patients with moderate-to-severe psoriasis with concomitant PsA  Also included only Japanese patients |

Studies included in the MAIC analysis are shaded.

BIW: biweekly; csDMARD: conventional synthetic DMARD; DMARD: disease-modifying anti-rheumatic drug; EOW: every other week; i.v.: intravenously; MAIC: Matching-Adjusted Indirect Comparison; NSAID: non-steroidal anti-inflammatory drug; PsA: psoriatic arthritis; QW: once weekly; Q4W: every 4 weeks; Q8W: every 8 weeks; Q12W: every 12 weeks; s.c.: subcutaneously; SEC: secukinumab; TNFi: tumour necrosis factor inhibitor.

Supplementary Table 3. Baseline characteristics before and after matching (sensitivity analysis).

|  | **IMPACT 2 trial** | | **FUTURE 2/3**  **(before matching)** | | | **FUTURE 2/3**  **(after matching)** | | |
| --- | --- | --- | --- | --- | --- | --- | --- | --- |
| **Baseline characteristics** | **INF 5 mg/kg (n = 100)** | **PBO (n = 100)** | **SEC 150 mg (n = 238)** | **SEC 300 mg (n = 238)** | **PBO   (n = 235)** | **SEC 150 mg  (ESS = 49)** | **SEC 300 mg**  **(ESS = 32)** | **PBO (ESS = 27)** |
| **Demographics** | | | | | | | | |
| Mean age, years (SD) | 47.1 (12.8) | 46.5 (11.3) | 48.6 (11.8)  p = 0.2991 | 48.3 (12.8)  p = 0.4317 | 50.0 (12.5) | **47.1 (6.9)**  **p = 1.0000** | **47.1 (5.6)**  **p = 1.0000** | **46.5 (5.4)** |
| Mean weight, kg (SD) | 87.9 (16.5) | 84.5 (20.3) | 88.8 (20.0)  p = 0.6918 | 86.4 (19.0)  p = 0.4918 | 84.1 (19.1) | **87.9 (11.7)**  **p = 1.0000** | **87.9 (7.1)**  **p = 1.0000** | **84.5 (7.6)** |
| Female, n (%) | 29 (29.0) | 49 (49.0) | 122 (51.3)  p = 0.0002 | 121 (50.6)  p = 0.0003 | 137 (58.3) | **29.0†**  **p = 1.0000** | **29.0†**  **p = 1.0000** | **49.0** |
| White, n (%) | 95 (95.0) | 94 (94.0) | 219 (92.0)  p = 0.3297 | 226 (94.6)  p = 0.8693 | 227 (96.6) | **95.0†**  **p = 1.0000** | **95.0†**  **p = 1.0000** | **94.0** |
| **Disease characteristics** | | | | | | | | |
| MTX use, n (%) | 47 (47.0) | 45 (45.0) | 105 (44.1)  p = 0.6268 | 115 (48.1)  p = 0.8510 | 120 (51.1) | **47.0†**  **p = 1.0000** | **47.0†**  **p = 1.0000** | **45.0** |
| Psoriasis (≥ 3% BSA), n (%) | 83 (83.0) | 87 (87.0) | 126 (52.9)  p < 0.0001 | 103 (43.1)  p < 0.0001 | 102 (43.4) | **83.0†**  **p = 1.0000** | **83.0†**  **p = 1.0000** | **87.0** |
| Mean PASI score (SD)**‡** | 11.4 (12.7) | 10.2 (9.0) | 12.2 (11.3)  p = 0.6342 | 10.8 (8.5)  p = 0.7011 | 10.9 (8.7) | **11.4 (5.8)**  **p = 1.0000** | **11.4 (6.0)**  **p = 1.0000** | **10.2 (4.7)** |
| Mean HAQ-DI score (SD) | 1.1 (0.6) | - 1. (0.6) | - 1. (0.6)   p = 0.1629 | - 1. (0.7)   p= 0.2125 | 1.2 (0.7) | **1.1 (0.4)**  **p = 1.0000** | - 1. **(0.3)**   **p = 1.0000** | **1.1 (0.3)** |
| Presence of dactylitis, n (%) | 40 (40.0) | 41 (41.0) | 68 (28.6)  p = 0.0397 | 92 (38.5)  p = 0.7953 | 63 (26.8) | **40.0†**  **p = 1.0000** | **40.0†**  **p = 1.0000** | **41.0** |
| Presence of enthesitis, n (%) | 42 (42.0) | 35 (35.0) | 159 (66.8)  p < 0.0001 | 144 (60.3)  p = 0.0021 | 163 (69.4) | **42.0†**  **p = 1.0000** | **42.0†**  **p = 1.0000** | **35.0** |
| Mean duration of PsA, years (SD) | 8.4 (7.2) | 7.5 (7.8) | 7.1 (8.4)  p = 0.1771 | 7.9 (8.5)  p = 0.6063 | 6.9 (7.3) | **8.4 (5.8)**  **p = 1.0000** | **8.4 (4.3)**  **p = 1.0000** | **7.5 (3.2)** |
| Mean SJC (SD) | 13.9 (7.9) | 14.4 (8.9) | 11.5 (9.5)  p = 0.0269 | 9.9 (7.1)  p < 0.0001 | 11.0 (9.5) | **13.9 (6.0)**  **p = 1.0000** | **13.9 (3.7)**  **p = 1.0000** | **14.4 (5.7)** |
| Mean CRP, mg/L (SD) | 1.9 (2.1) | 2.3 (3.4) | - 1. (2.0)   p = 0.0010 | 1. (1.6)   p < 0.0001 | 0.9 (1.6) | **1.9 (1.4)**  **p = 1.0000** | **1.9 (1.2)**  **p = 1.0000** | **2.3 (1.3)** |
| TNFi-naïve, n (%) | 100 (100.0) | 100 (100.0) | 157 (66.0)  p < 0.0001 | 162 (67.8)  p < 0.0001 | 156 (66.4) | **100.0**  **p = 1.0000** | **100.0**  **p = 1.0000** | **100.0** |
| **Variables not used for matching** | | | | | | | | |
| Mean SF-36 PCS (SD) | 33.0 (9.4) | 31.0 (9.0) | 37.1 (7.9)  p < 0.0001 | 38.3 (8.3)  p < 0.0001 | 37.4 (8.6) | **38.1 (4.0)**  **p < 0.0001** | **39.0 (4.1)**  **p < 0.0001** | **38.8 (4.1)** |
| Mean SF-36 MCS (SD) | 45.5 (11.9) | 47.0 (11.9) | 42.0 (11.0)  p = 0.0096 | 43.1 (11.5)  p = 0.0838 | 43.3 (10.9) | **43.7 (7.0)**  **p = 0.2240** | **46.1 (5.8)**  **p = 0.6967** | **44.8 (4.5)** |


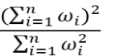
**†**Integer population (n) values are not available due to calculation of pooled SEC ESS using the equation:

**‡**PASI data were collected only for patients with psoriasis affecting ≥ 3% BSA.

BSA: body surface area; CRP: C-reactive protein; ESS: effective sample size; HAQ-DI: Health Assessment Questionnaire Disability Index; INF: infliximab; MCS: Mental Component Summary; MTX: methotrexate; PASI: Psoriasis Area and Severity Index; PBO: placebo; PCS: Physical Component Summary; PsA: psoriatic arthritis; SD: standard deviation; SEC: secukinumab; SF-36: 36-item Short-Form Health Survey; SJC: swollen joint count; TNFi: tumour necrosis factor inhibitor.

Supplementary Table 4. ACR 20 response rates for secukinumab 150 mg, secukinumab 300 mg and infliximab at week 54/52 estimated by alternative imputation methods (principal analysis).

|  | **INF 5 mg/kg**  n = 90 | **SEC 150 mg**  ESS = 84 | **SEC 300 mg**  ESS = 70 |
| --- | --- | --- | --- |
| **NRI** | | | |
| ACR 20 response, % (95% CI) | 58.9  (48.7–69.1) | 75.3  (69.8–80.9) | 72.6  (66.8–78.3) |
| OR, mean**†**  (95% CI) |  | **2.13**  **(1.11–4.09)**  **p = 0.022‡** | 1.85  (0.94–3.62)  p= 0.074 |
| **LOCF** | | | |
| ACR 20 response, %  (95% CI) | 58.9  (48.7–69.1) | 77.9  (72.6.5–83.3) | 75.9  (70.4–81.4) |
| OR, mean**†**  (95% CI) |  | **2.46**  **(1.27–4.79)**  **p= 0.008‡** | **2.20**  **(1.10–4.39)**  **p= 0.025‡** |

Two-sided pvalues (bold text when p < 0.05) were derived from OR values using the Z-statistic. **†**OR values calculated for comparison between SEC 150 mg or SEC 300 mg versus INF 5 mg/kg. Numbers shown are the absolute mean response rate (IMPACT 2) and the predicted mean response rate (FUTURE 2 and FUTURE 3). All pvalues are based on pairwise comparisons vs INF 5 mg/kg using ORs. **‡**Evidence of higher outcomes for SEC over INF.

ACR: American College of Rheumatology; ACR 20: at least a 20% improvement according to the ACR response criteria; CI: confidence interval; ESS: effective sample size; INF: infliximab; LOCF: last observation carried forward; NRI: non-responder imputation; OR: odds ratio; SEC: secukinumab.

Supplementary Table 5. ACR 20, ACR 50 and ACR 70 response rates (odds ratios) for secukinumab 150 mg and secukinumab 300 mg versus infliximab (sensitivity analysis).

| **Sensitivity analysis (SEC 150 mg vs INF)** | | | **Sensitivity analysis (SEC 300 mg vs INF)** | | |
| --- | --- | --- | --- | --- | --- |
| **ACR 20** | **ACR 50** | **ACR 70** | **ACR 20** | **ACR 50** | **ACR 70** |
| **Week 6 (IMPACT 2)/week 8 (FUTURE 2/3), placebo-adjusted data** | | | | | |
| 0.76  (0.22–2.66)  p= 0.673 | 0.24 (0.03–1.67)  p = 0.148 | NE**‡** | 0.36  (0.10–1.34)  p= 0.127 | 0.32 (0.04–2.30)  p = 0.256 | NE**‡** |
| **Week 14 (IMPACT 2)/week 16 (FUTURE 2/3), placebo-adjusted data** | | | | | |
| 2.62 (0.75–9.14)  p = 0.132 | 2.18 (0.40–12.01)  p = 0.370 | 1.16 (0.07–18.35)  p = 0.915 | 0.98 (0.26–3.71)  p = 0.977 | 1.80 (0.32–10.20)  p = 0.508 | 1.60 (0.11–23.76)  p = 0.735 |
| **Week 24, non-placebo-adjusted data** | | | | | |
| **3.03 (1.39–6.63)**  **p = 0.005§** | 1.63 (0.82–3.25)  p = 0.164 | 1.43 (0.69–2.99)  p = 0.337 | 1.90 (0.81–4.42)  p = 0.138 | 0.95 (0.42–2.14)  p = 0.898 | 0.75 (0.29–1.94)  p= 0.554 |
| **Week 54 (IMPACT 2)/week 52 (FUTURE 2/3),†  non-placebo-adjusted data** | | | | | |
| **3.87 (1.60–9.36) p = 0.003§** | 1.84 (0.91–3.73) p = 0.089 | 1.12 (0.49–2.54)  p = 0.791 | **2.74 (1.05–7.15) p = 0.039** | **3.04 (1.32–7.04) p = 0.009§** | **2.74 (1.16–6.46)**  **p = 0.021** |

Data are shown as odds ratios (95 % confidence interval). Two-sided p values (bold text when p < 0.05) were derived from OR values using the Z-statistic.

Using our updated statistical interpretation, pvalues indicating increasing evidence (0.1 > p > 0.001) are shown in grey cells. Note that no pvalues indicating strong evidence (p≤ 0.001) were observed. **†**Observed imputation used at week 54/week 52.**‡**ORs cannot be calculated as the proportion of ACR 70 responders in the IMPACT 2 placebo arm is 0. **§**Evidence of higher outcomes for SEC over INF.

ACR: American College of Rheumatology; ACR 20/50/70: at least a 20%, 50% or 70% improvement according to the ACR response criteria; INF: infliximab; NE: not estimable; OR: odds ratio; SEC: secukinumab.

Supplementary Table 6. SF-36 scores for infliximab, secukinumab 150 mg and secukinumab 300 mg (sensitivity analysis). † ‡ § ¶

|  | **IMPACT 2**  **INF 5 mg/kg** | | | **Sensitivity analysis**  **FUTURE 2/3**  **SEC 150 mg** | | | **Sensitivity analysis**  **FUTURE 2/3**  **SEC 300 mg** | | |
| --- | --- | --- | --- | --- | --- | --- | --- | --- | --- |
| **Placebo-adjusted** | **Non-placebo-adjusted** | | **Placebo-adjusted** | **Non-placebo-adjusted** | | **Placebo-adjusted** | **Non-placebo-adjusted** | |
| **Week 14/16**  (INF, n = 100; PBO, n = 100) | **Week**  **24**  (n = 100) | **Week 54/52†**  (n = 84) | **Week 14/16**  (SEC,  ESS = 49; PBO,  ESS = 27) | **Week**  **24**  (SEC, ESS = 49) | **Week 54/52†**  (SEC, ESS = 49) | **Week 14/16**  (SEC,  ESS = 32; PBO,  ESS = 27) | **Week**  **24**  (SEC,  ESS = 32) | **Week 54/52†**  (SEC,  ESS = 32) |
| SF-36 PCS score, mean change from baseline (95% CI) | 8.0 (5.5–10.5) | 7.7 (5.8–9.6) | 8.8 (6.5–11.1) | 6.0 (4.7–7.3)  p = 0.158 | 8.1 (7.3–9.0)  p = 0.690 | 8.7 (7.8–9.7)  p = 0.958 | 6.7 (5.4–8.0)  p = 0.361 | 8.1 (7.0–9.1)  p = 0.730 | 8.6 (7.7–9.6)  p = 0.895 |
| SF-36 MCS score, mean change from baseline (95% CI) | 5.0 (2.2–7.8) | 3.9 (1.6–6.2) | 3.7 (1.7–5.7) | 6.1 (4.4–7.7)  p = 0.522 | **6.8 (5.6–8.0) p = 0.032‡** | 5.9 (4.7–7.1) p= 0.068 | 3.3 (1.5–5.1)  p = 0.318 | 3.3 (1.7–4.8) p = 0.661 | 4.6 (3.1–6.2) p= 0.469 |

Bold indicates statistically significant differences (p < 0.05) in mean changes from baseline between SEC and INF. Using our updated statistical interpretation, pvalues indicating increasing evidence (0.1 > p > 0.001) are shown in grey cells. Note that no pvalues indicating strong evidence (p≤ 0.001) were observed. **†**LOCF imputation used. **‡**Evidence of higher outcomes for SEC over INF. CI: confidence interval; ESS: effective sample size; INF: infliximab; LOCF: last observation carried forward; MCS: Mental Component Summary; PBO: placebo; PCS: Physical Component Summary; SEC: secukinumab; SF-36: 36-item Short-Form Health Survey.

# Supplementary References

1. Tintle SJ, Gottlieb AB. Psoriatic arthritis for the dermatologist*.* *Dermatol Clin* 33(1), 127–148 (2015).

2. Gottlieb A, Sigurgeirsson B, Blauvelt A, Mpofu S, Martin R, Papavassilis C. Secukinumab shows substantial improvement in both psoriasis symptoms and physical functioning in moderate-to-severe plaque psoriasis patients with psoriatic arthritis: a subanalysis of a phase 3, multicenter, double-blind, placebo-controlled study*.* *Arthritis Rheumatol* 65 S136–137 (2013).

3. Gottlieb AB, Langley RG, Philipp S *et al*. Secukinumab improves physical function in subjects with plaque psoriasis and psoriatic arthritis: results from two randomized, phase 3 trials*.* *J Drugs Dermatol* 14(8), 821–833 (2015).

4. Blauvelt A, Gottlieb A, Sigurgeirsson B, Papavassilis C, Martin R. Secukinumab efficacy in subjects with moderate-to-severe plaque psoriasis and concomitant psoriatic arthritis: a subanalysis of the ERASURE study*.* *J Am Acad Dermatol* 70(5), AB2 (2014).

5. Gottlieb A, Sigurgeirsson B, Blauvelt A, Gong Y, Papavassilis C, Mpofu S. Secukinumab reduces hsCRP levels in subjects with moderate-to-severe plaque psoriasis and concomitant psoriatic arthritis: a sub-analysis from the phase 3 ERASURE study. AB0738*.* *Ann Rheum Dis* 73(Suppl 2), 1047–1048 (2014).

6. Philipp S, Gottlieb A, Langley RG *et al*. Secukinumab decreases inflammation as measured by a biomarker hsCRP in subjects with moderate-to-severe plaque psoriasis and concomitant psoriatic arthritis: subanalyses from two phase 3 studies*.* *Exp Dermatol* 24(3), E27 (2015).

7. Gottlieb A, Langley RG, Philipp S, Martin R, Papavassilis C, Mpofu S. Improvement in psoriasis symptoms and physical functioning with secukinumab compared with placebo and etanercept in subjects with moderate-to-severe plaque psoriasis and psoriatic arthritis. *Arthritis Rheumatol* 65(12), 3319–3329 (2013).

8. Sigurgeirsson B, Gottlieb A, Langley RG, Philipp S, Martin R, Papavassilis C. Effect of secukinumab on psoriasis symptoms and physical functioning compared with placebo and etanercept in subjects with moderate-to-severe plaque psoriasis and concomitant psoriatic arthritis: a subanalysis from the phase 3 FIXTURE study. *Scand J Rheumatol* 43(Suppl 127), 64–65 (2014).

9. Mease PJ, McInnes IB, Kirkham B *et al*. Secukinumab inhibition of interleukin-17A in patients with psoriatic arthritis*.* *N Engl J Med* 373(14), 1329–1339 (2015).

10. Gottlieb A, Mease P, McInnes IB *et al*. Secukinumab, a human anti-interleukin-17A monoclonal antibody, significantly reduces psoriasis burden in patients with psoriatic arthritis: results from a phase 3 randomized controlled trial. *Arthritis Rheumatol* 66(Suppl 10), S233 (2014).

11. Mease PJ, McInnes IB, Kirkham B *et al*. Secukinumab, a human anti–interleukin-17A monoclonal antibody, improves active psoriatic arthritis and inhibits radiographic progression: efficacy and safety data from a phase 3 randomized, multicenter, double-blind, placebo-controlled study*.* *Arthritis Rheumatol* 66(Suppl 10), S423 (2014).

12. Mease PJ, McInnes IB, Kirkham B *et al*. Secukinumab provides sustained improvements in psoriatic arthritis: 2-Year efficacy and safety results from a phase 3 randomized, double-blind, placebo-controlled trial*.* *Arthritis Rheumatol* 67(Suppl 10), (2015).

13. Mease P, McInnes IB, Kirkham B *et al*. Secukinumab improves physical function, quality of life, fatigue and work productivity in patients with active psoriatic arthritis: results of a randomized, double-blind, placebo-controlled phase 3 trial (FUTURE 2). *J Invest Dermatol* 135(Suppl 3), S29 (2015).

14. Strand V, Mease PJ, McInnes IB *et al*. Secukinumab, an anti–interleukin-17a monoclonal antibody, improves physical function, quality of life and work productivity in patients with active psoriatic arthritis: results from a phase 3, randomized, controlled trial. *Arthritis Rheumatol* 66(Suppl 10), S240–241 (2014).

15. van der Heijde D, Landewe R, Mease PJ *et al*. Secukinumab, a monoclonal antibody to interleukin-17a, provides significant and sustained inhibition of joint structural damage in active psoriatic arthritis regardless of prior TNF inhibitors or concomitant methotrexate: a phase 3 randomized, double-blind, placebo-controlled study. *Arthritis Rheumatol* 66(Suppl 10), S424–425 (2014).

16. McInnes IB, Mease PJ, Kirkham B *et al*. Secukinumab, a human anti-interleukin-17A monoclonal antibody, in patients with psoriatic arthritis (FUTURE 2): a randomised, double-blind, placebo-controlled, phase 3 trial*.* *Lancet* 386(9999), 1137–1146 (2015).

17. Gottlieb A, McInnes IB, Mease PJ *et al*. Secukinumab improves signs and symptoms of active psoriatic arthritis: results from a phase 3 randomized, multicenter, double-blind, placebo-controlled study using a subcutaneous dosing regimen (FUTURE 2). *J Invest Dermatol* 135(Suppl 3), S29 (2015).

18. Gottlieb A, Strand V, McInnes IB *et al*. Secukinumab improves physical function, quality of life, fatigue and work productivity in patients with active psoriatic arthritis: results of a randomized, double-blind, placebo-controlled phase 3 trial (FUTURE 2)*.* *J Invest Dermatol* 135(Suppl 3), S30 (2015).

19. Kavanaugh A, McInnes IB, Mease P *et al*. Secukinumab provides sustained improvements in the signs and symptoms of active psoriatic arthritis in anti-TNF-naive patients and those previously exposed to anti-TNF therapy: 52-week results from a randomized, double-blind, placebo-controlled phase 3 trial with subcutaneous dosing*.* *Arthritis Rheumatol* 67(Suppl 10), (2015).

20. McInnes IB, Mease P, Kirkham B *et al*. Secukinumab, a human anti-interleukin-17a monoclonal antibody, improves active psoriatic arthritis: 24-week efficacy and safety data from a phase 3 randomized, multicenter, double-blind, placebo-controlled study using subcutaneous dosing*.* *Arthritis Rheumatol* 66 3529–3540 (2014).

21. Mease P, Kirkham B, McInnes IB *et al*. Secukinumab is effective in reducing dactylitis and enthesitis using multiple measures in patients with psoriatic arthritis: results of a phase 3 randomized, multicenter, double-blind, placebo-controlled study (FUTURE 2). *J Invest Dermatol* 135(Suppl 3), S30 (2015).

22. Rahman P, Strand V, McInnes IB *et al*. Secukinumab improves physical function, quality of life, fatigue and work productivity in patients with active psoriatic arthritis in FUTURE 2, a phase 3 trial. THU0433*.* *Ann Rheum Dis* 74(Suppl 2), 356 (2015).

23. Antoni C, Kavanaugh A, Kirkham B *et al*. Sustained benefits of infliximab therapy for dermatologic and articular manifestations of psoriatic arthritis: results from the infliximab multinational psoriatic arthritis controlled trial (IMPACT)*.* *Arthritis Rheumatol* 52(4), 1227–1236 (2005).

24. Antoni CE, Kavanaugh A, van der Heijde D *et al*. Two-year efficacy and safety of infliximab treatment in patients with active psoriatic arthritis: findings of the Infliximab Multinational Psoriatic Arthritis Controlled Trial (IMPACT)*.* *J Rheumatol* 35(5), 869–876 (2008).

25. Kavanaugh A, Antoni CE, Gladman D *et al*. The Infliximab Multinational Psoriatic Arthritis Controlled Trial (IMPACT): results of radiographic analyses after 1 year*.* *Ann Rheum Dis* 65(8), 1038–1043 (2006).

26. Antoni C, Krueger GG, de Vlam K *et al*. Infliximab improves signs and symptoms of psoriatic arthritis: results of the IMPACT 2 trial*.* *Ann Rheum Dis* 64(8), 1150–1157 (2005).

27. Kavanaugh A, Antoni C, Krueger GG *et al*. Infliximab improves health related quality of life and physical function in patients with psoriatic arthritis*.* *Ann Rheum Dis* 65(4), 471–477 (2006).

28. Kavanaugh A, Krueger GG, Beutler A *et al*. Infliximab maintains a high degree of clinical response in patients with active psoriatic arthritis through 1 year of treatment: results from the IMPACT 2 trial*.* *Ann Rheum Dis* 66(4), 498–505 (2007).

29. McInnes IB, Sieper J, Braun J *et al*. Efficacy and safety of secukinumab, a fully human anti-interleukin-17A monoclonal antibody, in patients with moderate-to-severe psoriatic arthritis: a 24-week, randomised, double-blind, placebo-controlled, phase II proof-of-concept trial*.* *Ann Rheum Dis* 73(2), 349–356 (2014).

30. McInnes IB, Sieper J, Braun J *et al*. Secukinumab, a fully human anti-interleukin-17A antibody, improves signs and symptoms of psoriatic arthritis: a 24-week, double-blind, placebo-controlled, multicenter trial*.* *Dermatol Ther* 2(1), 10 (2012).

31. McInnes I, Sieper J, Braun J *et al*. Effect of secukinumab on signs and symptoms of psoriatic arthritis: results of a 24-week multicentre, double-blind, randomized, placebo-controlled trial. *Rheumatology* 51, 90–91 (2012).

32. Baranauskaite A, Raffayová H, Kungurov N *et al*. Infliximab plus methotrexate is superior to methotrexate alone in the treatment of psoriatic arthritis in methotrexate-naive patients: the RESPOND study*.* *Ann Rheum Dis* 71(4), 541–548 (2012).

33. Saougou I, Markatseli TE, Papagoras C, Voulgari PV, Alamanos Y, Drosos AA. Sustained clinical response in psoriatic arthritis patients treated with Anti-TNF agents: a 5-year open-label observational cohort study*.* *Semin Arthritis Rheum* 40(5), 398–406 (2011).

34. Saougou I, Markatseli TE, Voulgari PV, Papagoras C, Drosos AA. Sustained clinical response in psoriatic arthritis patients treated with anti-TNF agents: a 5-year long-term study*.* *Arthritis Rheumatol* 60, 1781 (2009).

35. Torii H, Nakagawa H. Infliximab monotherapy in Japanese patients with moderate-to-severe plaque psoriasis and psoriatic arthritis. A randomized, double-blind, placebo-controlled multicenter trial*.* *J Dermatol Sci* 59(1), 40–49 (2010).
